# Supplementary material for: Genome-Wide Identification of the Rose SWEET Gene Family and Their Different Expression Profiles in Cold Response between Two Rose Species
Source: MDPI journal article supplement (doi:10.3390/plants12071474), 2023-03-28
Supplement: s1 [file s1]

**Table S5.** The numbers of predicted cis-elements in the promoters of 25 *RcSWEET* genes.

| Element    | ABRE | ARE       | AuxRR-core | Box 4 | CGTC A-motif | circadian         | ERE      | GARE-motif  | LTR             | MBS     | P-box       | TATC-box    | TCA-element    | TC-rich            | TGACG-motif | TGA-element | WUN-motif |
|------------|------|-----------|------------|-------|--------------|-------------------|----------|-------------|-----------------|---------|-------------|-------------|----------------|--------------------|-------------|-------------|-----------|
| Annotation | ABA  | Anaerobic | Auxin      | Light | MeJA         | Circadian control | Ethylene | Gibberellin | Low temperature | Drought | Gibberellin | Gibberellin | Salicylic acid | Defense and stress | MeJA        | Auxin       | Wound     |
| RcSWEET1   |      | 1         |            | 2     | 1            |                   | 1        |             |                 |         |             | 1           |                |                    | 1           | 2           | 1         |
| RcSWEET2a  | 5    | 4         |            |       |              | 2                 | 1        | 1           | 2               | 2       | 1           |             |                |                    |             |             |           |
| RcSWEET2b  | 4    | 2         |            | 4     | 1            | 2                 |          |             | 2               |         |             | 1           |                | 1                  | 1           | 2           |           |
| RcSWEET3   |      | 7         |            | 4     |              |                   |          |             |                 | 2       | 1           |             | 1              |                    |             |             |           |
| RcSWEET4a  | 3    | 3         |            | 7     |              | 1                 | 3        |             |                 | 1       |             | 1           |                | 1                  |             |             |           |
| RcSWEET4b  | 3    | 3         |            |       | 2            |                   | 1        | 1           | 1               | 1       |             | 1           |                | 1                  | 2           |             | 2         |
| RcSWEET5a  | 3    | 3         |            | 2     | 4            |                   |          |             |                 |         |             | 1           |                |                    | 4           | 2           |           |
| RcSWEET5b  |      | 6         |            | 2     | 2            | 1                 |          |             |                 | 1       |             |             | 1              |                    | 2           | 1           |           |
| RcSWEET5c  | 2    | 2         |            | 1     |              |                   |          |             |                 | 1       | 1           |             | 1              |                    |             |             |           |
| RcSWEET5d  | 4    | 3         |            | 2     | 1            |                   |          | 1           |                 |         |             |             |                | 1                  | 1           |             |           |
| RcSWEET5e  | 6    | 2         | 1          | 4     | 1            |                   | 2        |             |                 |         |             |             | 1              | 1                  | 1           | 1           | 1         |
| RcSWEET5f  | 2    | 1         |            | 2     | 1            | 1                 |          |             | 1               |         |             |             | 1              | 2                  | 1           |             |           |
| RcSWEET5g  | 6    | 4         |            |       | 2            |                   | 1        |             | 2               | 2       |             |             | 1              |                    | 2           | 1           |           |
| RcSWEET5h  |      | 2         |            | 1     |              |                   |          | 1           | 1               | 3       |             |             | 1              |                    |             | 1           |           |
| RcSWEET9   | 2    |           |            | 3     | 1            |                   |          | 1           |                 | 1       |             |             |                |                    | 1           | 2           |           |
| RcSWEET10a | 1    | 1         |            | 3     |              |                   |          | 1           |                 | 3       |             |             | 1              |                    |             |             | 1         |
| RcSWEET10b | 2    | 4         |            | 3     |              |                   |          |             | 1               | 3       |             |             |                |                    |             |             |           |
| RcSWEET10c | 9    | 5         | 1          | 2     |              |                   | 1        |             | 1               |         |             |             | 1              | 1                  |             | 1           | 3         |
| RcSWEET11a | 4    | 1         |            |       | 1            |                   | 3        |             | 1               |         | 1           | 1           |                |                    | 1           |             | 1         |
| RcSWEET11b | 5    | 5         |            | 4     | 1            |                   |          |             |                 | 1       |             |             | 1              |                    | 1           |             | 1         |
| RcSWEET12  | 2    |           |            | 7     | 2            |                   | 1        |             |                 |         |             |             |                | 2                  | 2           |             | 2         |
| RcSWEET15a | 4    | 3         |            | 6     | 3            | 1                 |          | 1           | 1               |         |             |             | 1              | 1                  | 3           |             |           |
| RcSWEET15b | 4    |           |            | 2     | 3            |                   |          |             | 2               |         | 1           | 2           | 1              |                    | 3           | 1           | 1         |
| RcSWEET17a | 1    | 1         |            | 2     | 1            |                   | 1        |             | 2               |         | 1           |             |                |                    | 1           | 1           |           |
| RcSWEET17b | 3    | 1         |            | 5     | 2            |                   |          |             | 1               |         |             |             |                |                    | 2           | 1           | 1         |
