# Supplementary material for: Genome-Wide Identification of the Rose SWEET Gene Family and Their Different Expression Profiles in Cold Response between Two Rose Species
Source: Plants (Basel). 2023 Mar 28;12(7):1474. doi: 10.3390/plants12071474 (PMC10096651; doi:10.3390/plants12071474)
Supplement: Supplementary file 1 [file plants-12-01474-s001.zip]

Archive with 8 entries (8 files):
- Supplementary file1-Figure S1.pdf
- Supplementary file2-Table S1.xlsx
- Supplementary file3-Table S2.xlsx
- Supplementary file4-Table S3.xlsx
- Supplementary file5-Table S4.xlsx
- Supplementary file6-Table S5.pdf
- Supplementary file7-Table S6.xlsx
- Supplementary file8-Table S7.xlsx
