# Supplementary material for: Genome-Wide Identification of the Rose SWEET Gene Family and Their Different Expression Profiles in Cold Response between Two Rose Species
Source: Plants (Basel). 2023 Mar 28;12(7):1474. doi: 10.3390/plants12071474 (PMC10096651; doi:10.3390/plants12071474)
Supplement: Supplementary file 1 [file plants-12-01474-s001.zip › Supplementary file2-Table S1.xlsx]

## Sheet: Sheet1
Additional file 1: Table S1 Primers used in this study.
Genes	Types of primers	Primer sequences (5'-3')	Primers description
Rba-Tubulin	Forward	ATTGAGCGTCCCACCTACAC	Reference gene
	Reverse	AGCATGAAATGGATCCTTGG
RbSWEET1	Forward	CGGTGCAGTAATCGAAGCCA	For qRT-PCR
	Reverse	GAGGCCACACAAGAGCTTCC
RbSWEET2a	Forward	GCAGCTGGAATTGCTGGTAA	For qRT-PCR
	Reverse	GCCACCCATATGATCCCAGT
RbSWEET2b	Forward	TTCAGCTGGTGCAGTGTTTC	For qRT-PCR
	Reverse	GCAAGCTCCCAACGACTATG
RbSWEET3	Forward	GTTGGAAGTCTAGGGCTGGT	For qRT-PCR
	Reverse	TAGGCGACGCAAGAAAGAGA
RbSWEET4b	Forward	GGTATGGTCATCGAGGTCGT	For qRT-PCR
	Reverse	AGCGGTAAGAACACCAAGGA
RbSWEET10c	Forward	TCATAGCGGCACCAAACGTG	For qRT-PCR
	Reverse	CCCGCCTGTTTGTGCTTAGT
RbSWEET15a	Forward	GCACTATCGCAACATCCGAA	For qRT-PCR
	Reverse	CAGTTGAAGCTCACCCGATG
RbSWEET17a	Forward	TTGTGAGAATCGCAAAGCGT	For qRT-PCR
	Reverse	AACAATCTCGACAGCAGCAC
RbSWEET1	Forward	caaatcgactctagaaagcttATGGACGTCCTCAAGTTCTTGTTC	For transient expression vector construction
	Reverse	gcccttgctcaccatggtaccAACACCATTAACGCCATTTGC
RbSWEET2a	Forward	caaatcgactctagaaagcttATGTTGACAATGGAGTTGTCTTCTG	For transient expression vector construction
	Reverse	gcccttgctcaccatggtaccCACATATGTAACTATCAAGGGTTCTCTCA
RbSWEET10c	Forward	caaatcgactctagaaagcttATGGCACCCCTTAATCTTCATCT	For transient expression vector construction
	Reverse	gcccttgctcaccatggtaccTATTGAGGCCCTTCTGAGTGTGA
