# Supplementary material for: Genome-Wide Identification of the Rose SWEET Gene Family and Their Different Expression Profiles in Cold Response between Two Rose Species
Source: Plants (Basel). 2023 Mar 28;12(7):1474. doi: 10.3390/plants12071474 (PMC10096651; doi:10.3390/plants12071474)
Supplement: Supplementary file 1 [file plants-12-01474-s001.zip › Supplementary file4-Table S3.xlsx]

## Sheet: Sheet1
Additional file 3: Table S3 Nucleotide sequences of 25 RcSWEET genes.
>RcSWEET17a [gene=LOC112176490]
ATGGCAATAAGTTCGATTACCATTTTTGGGGTGCTAGGCAACATTATGTCAGGATTACTCTACCTTTCTCCTACAAACGTGTTTGTGAGAATCGCAAAGCGTAGATCAACAGAGGAATTTGAGAGTATTCCTTATATTAGCAAACTGTTGAATGCTTACTTCTGGGTTTACTATGGATTTATTAAGCCTAACAGCGTGGTCGTCGCCACTGTCAATGTTTTCGGTGCTGCTGTCGAGATTGTTTTCCTTACCATATTTCTACTTTTTGCACCACCAAGAATGAAGGTTAGGACTGCGATACTAGTTATAGTTCTGGATGTTGCATTTCCCGGAGCAACAATTTTACTTACTCACTTTCTGCTAGACGGAGATAAAAGGATCGATGTTGCTGGACTCTGG…
>RcSWEET5f [gene=LOC112167162]
ATGGTGCACACAGATGCTAGGTTCGTTGTCGGTGTGGTTGGAAACGTGATCTCTGGTGGCCTTTTCCTCTCCCCAATTCCTACTTTCATACAAATATGGAGAAAAAAAGATGTGGAAGCTTTCGATCCAAAACCTTACCTTACAACAGTGTTGAACTGTTTGTTCTGGTGTTACTACGGATTGCCATTCGTTAATCCAAACAGCATTTTAGTTGTCACTATTAATGGAATTGGGCTATTTATAGAGCTCATATATCTGATCATATTCTTCTATTATGCCGCAGCAAAAGGACGAAAGAGGGTTGTTACATACTTTATATGCGAACTTACTTTATTTGGGGCTCTAGTGGCTGCAACTATGTTGGCAATACCTGAGCATAAGATGGTGATGAATCGACAT…
>RcSWEET5g [gene=LOC112186521]
ATGGTGCACACAGATGCTAGGTTTGCGGTCGGTGTGGTTGGGAATGTCATCTCTGGCGGCCTTTTCCTCTCCCCAATTCCTACGTTCATACAAATATGGAGAAAAAAAGATGTGGAAGCTTTCGATCCAAGACCATACCTTACAACAGTGTTAAACTGTTTGTTCTGGTGTTACTACGGATTGCCATTTGTTAACCCAAATAGCATTTTAGTTGTCACTATTAATGGAATTGGGCTATTTATAGAGCTCATATATCTTGTCATATTCTTCTATTATGCCGCAGCAAAAGGACGAAAGAGGGTTGCTACATACTTTATATGTGAACTTATTTTATTTGGGGCTTTGGTGGCTGCAACTATGTTGGCAATACCTGAACATAAGATGGCGATGAATCGACCT…
>RcSWEET5h [gene=LOC112190416]
ATGGTGCACACAGATGCTAGGTTCGTGGTCGGTGTGGTTGGGAATGTCATCTCTGGCGGCCTTTTCCTCTCCCCAATTCCTACGTTCATACAAATATGGAGAAAAAAAGATGTGGAAGCTTTCGATCCAAGACCTTACCTTACAACAGTGTTAAACTGTTTGTTCTGGTGTTACTATGGATTGCCATTTGTTAACCCAAATAGCATTTTAGTTGTCACTATTAATGGAATTGGGCTATTTATAGAGCTCATATATCTTATCATATTCTTCTATTACGCCGCAGCAAAAGGACGAAAGAGGGTTGCTACATACTTTATATGTGAACTTATTTTATTTGGTGCTTTGGTGGCTGCAACTATGTTAGCAATACCTGAGCATAAGACGGCAATGAATCGACCT…
>RcSWEET3 [gene=LOC112181844]
ATGGGAGAGAGGCTGCGATTGGCAACTGGGGTGATGGGAAATGCTGCTTCTTTGTTGCTTTACTCGACTCCCATATTGACTATGTCAAGGATCACAAGAAAGAAAAGTACAGAGGAGTTTTCATGTGTACCTTACATCACTGCATTGCTCAACTGTCTCCTTTATACTTGGTATGGATTGCCTGTTGTAAGCTGTGGCTGGGAAAACTTTCCAGTGGTCACCATCAATGGTCTGGGAATTCTTCTTGAGTTCTCATTCATTCTCATATACTTCTGGTTTGCTTCACCTACAAGAAAGATGAAGGTAATTGCAATTCTGATACCTGTTATGGTCATGTTCTGCATCACCGTTAGCATCTCAACCTTTGTTTTCCATGACCACCGTCATCGAAAGGAATTT…
>RcSWEET5c [gene=LOC112184760]
ATGGTGAACACAGATGCCATTAGAACTGTTGTTGGGATCATTGGTAATGTCATCTCTTTCGGCTTGTTTACGTCCCCAATCCCAACATTTGTAAAGATAATTAAGGACAAATCAGTTAGAGATTTCAAGGCCGATCCTTATGTAGCAACTTTGCTTAATTGTGCTATGTGGTCCTTTTATGGCCTTCCCATTGTCCATCCTGATAGTCTCCTCGTTGTTACGATCAATGGCGCTGGCTTCTTCATCGAACTCATCTATGTTTCAATCTTTCTCTTATATTCTCCTGCCCAAAAACGGCGAAAAATCATCAGTGCTCTTCTGGTTGAAGCAATCTTTTTTGCCGTTGTGGTTTTTATTACTATTCACGTTTTCCATACCACTAAAGACAGGTCTATGATA…
>RcSWEET4a [gene=LOC112185269]
ATGGGGCACACAGCTACAGCTAGGTTCGTGGTCGGTTTGATGGGAAATGTCATCTCTGCCGGGCTTTTTCTTTCCCCAGTTCCTACGTTCTTACAAATATGGAGAAAGAAAGATGTGGAAGCTTTCGATCCAAAACCTTACCTTGCTACAGTGTTAAACTGTTTGTTTTGGTGTTATTACGGAATGCCATTCGTCAATCCAAACAGTATTTTAGTTGTCACCATTAATGGAGCTGGGCTAGTAATAGAGCTTATATATCTTGCTATATTCTTCCTTTATGCTCCAGCAAAAGGACGGAAAAAGGTTACCACATTCTTAGTAGGTGAATTTGTTTTCTTTGCGGCTATTGTGGTTGCAACTATGTTGACAATATCTGAGCATAAGATGATGATGAATCGA…
>RcSWEET15b [gene=LOC112198953]
ATGGGCGCAGTAGCGGACAGTCAACATCCTTGGGCATTTGCATTTGGCATTCTAGGTAATCTAATTTCAATCATGGTTTACTTGGCCCCAGTGCCAACATTTTACCGGATTTACATAGGGAAATCGACTGAAAGTTTCCAATCCGTGCCATATCTGGTAGAACTGTTTAGTTCCACGCTTTGGGTCTACTATGCCATACTGAAGCAAAATGCTGTGCTATTCATCACAATTAACACCTTCGGAAGTGTGATGGAGACTTTGTACATCGCCATGTACATTGTTTATGCAACAAACGCTTCAAGGAAATTCACTATCAAGTTATTCGGGTTTATGAACTTGGGACTCTTTTCCTTGATCATTGTCCTTTTACACTATGTATTTCATACTCAATACCGTGTC…
>RcSWEET5e [gene=LOC112196855]
ATGGTGCACCTGGATGCTAGGTTCGTGGTCGGTGTGGTTGGAAATATCATCTCTGGCGGGCTTTTTCTCTCTCCAATACCTACGTTCATACAAATATGGAGAAAAAAAGATGTGGAAGCTTTCGATCCAAAACCTTACCTTGCAACAGTGTTGAACTGTTTGTTATGGTGTTACTATGGATTGCCATTTATTAATCCAAACAGCATTTTAGTTGTCACCATTAATGGAATTGGGTTACTTATAGAGCTTATATATCTGGGCATATTCTTCTATTATACTTCAGCAAAAGGACGAAAGAGGGTTGCTACATACTTTGTATGTGAACTAGTTTTCTTTGGGGCTGTTGTGGCTGCAACTATGTTGGCAATACCTGAGCATAAGATGAAGATGAATCGACAT…
>RcSWEET17b [gene=LOC112200151]
ATGGAAACTTTAAGTTTCTATATCGGAGTTATTGGAAACCTCATTTCAGTGCTAATGTTTCTTGCTCCTGTGTATACATTTTCCAGAATCATAAAGAACCGTTCGACAGAAGAGTTCAGTAGTCTTCCCTACGTCTGCACATTCCTCAACTGCTTCCTGTGGACTTACTACGGAATCATAAAGCCCGGAGCTTATCTTGTATCCACCATCAATGGCTTCGGAATTCTTGTGGAGATCGTCTATCTCTCTTTGTTTCTAACAAATGCCACAACAAACAAGAGGGTGAACACGGTGATCTGGATTGGTATCTTGGATGTGGGTTTTCCGGCAGCGGCCATTTTAGTGACTTGGCTGGCGTTGAAGGGAGATGTACGTATTAATGCAATAGGGTTCTTGAGT…
>RcSWEET15a [gene=LOC112196569]
ATGGGGGCAGTAGCAGACAGTCAACATCCTTGGGCATTTGCATTTGGCATCCTAGGTAATCTAATTTCCTTCATGGTTTACTTAGCCCCAGTGCCAACGTTTTACCGGATTTACAGAAAGAGATCTACTGAGGGTTTCCAATCGGTGCCGTATCTGGTAGCACTGTTTAGTGCCACGCTTTGGCTCTACTATGCCATGCTGAAGCAAAATGCTGTGCTTCTTATCACAATCAACACCTTCGGAAGTGTAATTGAGACTCTGTACATCGCCATGTATATTGTTTATGCAACAAAGGCTTCAAGGAAATTCACTATCAAGTTACTAGGGTTTATGAACTTCGGACTCTTCTCATTGATCCTTGTCGTTTTACACTATGCATTTCATAGTCAATACCGTGCC…
>RcSWEET2a [gene=LOC112201532]
ATGTTGACAATGGAGTTGTCTTCTGTGTATTTAGGTTTCAGTGTTGCAGCTGGAATTGCTGGTAATGTCTTTGCATTTGTGTTGTTTGTCTCACCAATACCAACATTTAAGAGAATCATCCGAAACAAGTCAACGGAACAATTCTCAGGATTGCCTTACATATATGCCTTTCTGAATTGCTTGATATGCCTCTGGTATGGCTCGCCTGCCGTGAAGACTGGGATCATATGGGTGGCTACAGTCAATTCATTTGGGGCAGTTTTCCAGTTAATCTACATAAGCATTTTCATCGCTTATGCTGAAAAAGAAATTAAGGTGAGGATGCTGGGATTGCTACTGGTAGTTCTTGCTATTTTTGGATTGATAGTCTATGTGAGCTTAAAAGTTTTAGACTATGAT…
>RcSWEET2b[gene=LOC112166177]
ATGGTTCTTTCTTCTCAATATTCCGCATTTCTAATTGCCAAAGATGCAGCTGGGGTTGCCGGCAATATCTTTGCTTTTGGGCTGTTTGTTTCACCCATGCCCACATTTAAAAGAATCATCAGAAATGGTTCAACTGAAGAGTTCTCAGGGCTGCCGTATATATATGCCCTTTTGAACTGCATGATCAGCATGTGGTATGGATCGCCTCTTATATCTACTGATAACATGTTGATTCTTACAGTCAATTCAGCTGGTGCAGTGTTTCAATTTGTCTACATAACCCTCTTCATAATCTATGCTGAGAAACCAAAAAAGGTGAGGATGCTGGGATTGCTGGTAGCAGTTTTTGGTCTATTTGCAATCATAGTCGTTGGGAGCTTGCAGATATCTGACCTTTTT…
>RcSWEET5b [gene=LOC112164442]
ATGGTGCACACAGATGCTAGATTCGTGGTCGGTGTGGTTGGGAATGTCATTTCTGGTGGCCTTTTCCTCTCTCCAATTCCTACATTCACACAGATATGGAGAAAAAAAGATGTGGAAGCTTTCGATCCAAAACCTTACCTTACAACAGTGTTGAACTGTTTGTTCTGGTGTTACTACGGATTGCCATTCGTGAATCCAAACAGCATTTTAGTTGTCACTATTAATGGAATTGGGCTATTTATAGAGCTCATGTATATTACCATATTCTTCTATTATGCCGCATCAAAAGGACGAAAGAGGGTTGCTACATACTTTATATGTGAACTTGTTTTATTTGGGGCTTTGGTGGCTGCAACTATGTTGGCAATACCTGAGCATAAGATGGCAATAAATCGACGT…
>RcSWEET1 [gene=LOC112172425]
ATGGACGTCCTCAAGTTCTTGTTCGGAATCTTCGGTAATGCCACCGCTCTCTTCCTCTTCTTGTCGCCGACGATTACATTCAAGAGGATCATACAGAAGAGAAACACAGAGCAGTTTTCAGGCATTCCTTACGTCATGACTCTCCTCAACTGCCTCCTCTCTGCTTGGTACGGGCTGCCGTTTGTGTCCCCGAACAACATTCTGGTGTCCACCATTAACGGCACCGGTGCAGTAATCGAAGCCATCTACGTGTTGATCTTCATCTTCTTTGCTCCCAAGAGAGAGAAGGCTAAGATTATGGGCCTCTTCATTTTTGTGCTGGCTCTGTTCTCCGTCGTGGCCTTGGTTTCCGTCTTTGCCCTTCACGGCAGTGGCAGGAAGCTCTTGTGTGGCCTCGCC…
>RcSWEET9 [gene=LOC112171608]
ATGGCAGCCCTTGATCTTCATCTTATGGCCTCTGTTTTTGGCATTCTGGGTACCATCTTCGCCTTCCTTGTCTACCTTGCCCCACTACCAACATTTTATAGGATTTTCAAGACAAAGTCTGTTCAAGGTTTCCAATCTATACCCTATTCAGTGGCATTGTTTAGCGCCATGTTAATGCTCTATTATGGCTTCCTCAAGACACATGCTTTAATTCTCATCGTGGTCAATTCCACTGGCAGCTTCATCGAAACTGTGTACCTTGTAATGTACTTGATTTATGCACCACCAAAAGTCAGGATTTTCACAGTAAAGCTGCTTGTCTTGTTTAATGTCTTGGCTTATGGTTTGATCTTAGGGGGTACAAGCCAAATCTCAAATGCTAGTCGGCGGTTGACAGTT…
>RcSWEET11b [gene=LOC112173793]
ATGGCAGCCCTTGATCTTCATCTTATGGCCTCTGTGTTTGGCATTCTGGGAACCATCGTCGCCTTCCTCGTCTACCTTGCCCCACTACCAACATTTTATAGGATTTTCAAGACAAAATCAACACAAGGTTTCCAAGCTATACCCTATTCGGTGGCATTGTTTAGCGCCATGTTAACGCTCTACTATGGCTTCCTCAAGACAAATGGTTTGTTTCTCATCGCGATCAATTCCATTGGCTGCTTCATCGAAACTGTGTACCTTGTAATGTACATGATTTATGCACCACCAAAAGCCAGGATTTTCACAGCAAAGCTACTTGTTCTGTTTAATGTCTTGACTTATGGTTTGATCTTATTGGGTACAAGCCAAATCCCAAATGTTCTTCTGCGGTTGAAAGTT…
>RcSWEET11a[gene=LOC112173492]
ATGGGAGCCCTTGATCTTGATCTTATGGCTTCTGTGTTTGGAATTTTGGGTACGATCGTCGCGTTCCTCGTTTACCTAGCCCCACTACCAACATTTTATTGGATTTTCAAGAAAAAATCAACACAAGGATTCCCATCTATACCCTATTCAGTGTCATTGTTTAGCGCCATGTTGACATTCTACTATGCCTTCGTCAAGACAAACTGTTTGCTGCTCATCACGATAAATTCCATTGGCTGCTTCATCGAAACCGTGTACCTTGTTGTGTTCATGATATATGCAACACCAAAATCCAGGACTTTTACAACAAAGCTGCTTATTCTGTTTAATATCTTGGGTTATGGTTTGATGTTATTGTGTACAAGCCTAGTCCCAAATGTTCTTGTGAGGTTGAAAGTT…
>RcSWEET10c [gene=LOC112173222]
ATGGCACCCCTTAATCTTCATCTTATGGCCTCTATATTTGGAATTCTGGGTACCGTCGGCTCGTTCCTCGTTTACCTAGCTCCAATACCAACATTTTATTGGATTTACAAGAAAAAATCAACATATGGATTCCCATCTCTACCCTACTCAGTGGCATTGTTTAGCGCCATGTTGACGCTCTACTATGCCTTCCTCAAGACACATTCTATGATTATCATCGCTATCAATTCCCTTGGCATCTTAATTGAAACCGGGTACCTTGTATTGTTCATGATTTATGCACCACCAAAATCCAGGATCTTCACAGCAAAGTTTCTTGGCCTCTTTAATGTTTTGGGTTTTGGTTTGATCGTATTATGTACATGCCTAATCCCAAATGATTTTCTGCGGTTGAAAATT…
>RcSWEET10b [gene=LOC112174578]
ATGGTAGCCCCTGATCCTCATACCCTGGCCTCTGTTTTTGGCATGCTAGGTACCCTCGTCTCCTTCCTCGTCTTGCTAGCCCCACTACCGACATTTTATAGGATTTACAAGAGAAAATCAGCAGACGGGTTCCAATCTTTACCATATTCAGTGGCTTTGTTTAGTGCCATGTTAATGCTCTACTATGCTTACATCAAAGAAAATGCTTATTTGCTCTTGGGAATCAATTCCTTTGGCTCCATCATAGAAACTATATACCTTATAGTTTACATGATTTACGCACCATCAAATTCCAGGATTTTCACGGCAAAGCTGCTAGTCCTGTTTAACTTTTTGGCTTATGGGGTGATCGTAGGAGTTACATACCAAATCCCAAATCCTCTTCTGCGGCTTAAAGTC…
>RcSWEET4b [gene=LOC112175327]
ATGGTTTCTGCAGATGCTGCTCGGACTGTGGTCGGTATTATAGGAAACCTCATCTCATTCTTTTTGTTCTTGTCGCCGGTTCCAACTTTTGTTCGAATATGGAAGAAAGGGTCAGTGGAGCAATACTCACCAGTCCCATACCTTGCAACCCTAGTCAACTGCATGGTGTGGACCTTGTATGGGTTACCCATCGTGCACCCGGATAGCACTCTGGTGTGGACCATAAACGGGTCGGGTATGGTCATCGAGGTCGTCTACATCATCCTCTTCCTCATTTATTCCGACAAGAAAAAGAGGCTTATGGTGGTTCTGGTGGTGGCTGTGGAGATCATATTCCTTGGTGTTCTTACCGCTCTGGTTCTCACTTTGGCTCACACGCATACCAAGAGGTCCTTGATT…
>RcSWEET12 [gene=LOC112180477]
ATGACGTCAAGTACTGCTCACTCCCCTCTGGTTTTTGCCTTTGGCATCCTAGGTAACATTGTCTCCTTCATCGTGTTTCTAGCTCCAGTGCCAACATTTTTCAGGGTGTACAAGAAGAAATCAACAGAAGGATTTCAATCAGTTCCATATGTATTTGCACTCTTCAGTGCAACGATCTGGATTTACTATGCATCCCTTAAATCTGATGAGATGCTTCTTATCACCATCAATGGCTTCGGTTGTGTCATCGAGACCATTTATATTGCAATGTACATTACATTTGCACCAAAGCAAGCTAGGGTGAACACCTTGAGGCTGCTTCTTCTTGTGAATTTTGGGGGATTTTGCTTGATTCTTCTTTTGTCTCACTTCCTAGCACAAGGGCCAACTCGGGTTAAA…
>RcSWEET10a [gene=LOC112176691]
ATGACTATTCATCACCCATTGACTTTGGCTTTTGGCCTCTTAGGCAACATTATCTCCTTTATGGTTTTCCTTGCTCCACTGCCAACCTTTTATACAATTTACAAGAAAAAAACAACTGAAGGGTTTCAAGCACTGCCATATGTGGTGGCACTCTTCAGCTGCATGCTGTGGATTTACTATGCGCTGCTTAAACAAGACGCCACATTTCTCATCACTATCAACTCTGTTGGCTGCGTCATTGAGACTGTTTACCTTGCCATTTTCCTTTTTTATTCCCCCAAGATGGCCAGGATCTCAACTGTAAAACTTCTGCTGTTGCTCAACGTGTTCGGATATGGCTTGATGCTTGTGCTTACTCACTTCCTTGCGAAAGGTGAAAAGCGTCTCAAGGTTGTGGGC…
>RcSWEET5a [gene=LOC112177410]
ATGGCCATAGCCACCCTCAAACCTCTTGTAGGGCTCCTAGGCAATCTCATCATTTTATGGTTGTTTGTCTCCCCAATCCCAACATTTGTGAAAATAATCAATAAAAAAACAGTAGGAGAATTCAAGCCAGATCCTTATTTAGCAACTTTGCTTAATTGCGCATTGTGGTTCTTTTATGGTCTACCGCGCGTCTGTCCGAACTTCAATAGCCTTTACTACTGTTATTTTCATGGACCGATTCCGATCGATCCTGCAATCATCGGTACCGGAATCTTTCTTGAACTCGTCTACATTGCCATCTTCTTTGCATATTCTTCGGCAACGAAACGCATAAATGTCATCATTGCTCTTGTGATTGAAGTTTTCTGCCTTCTTCTTGTTGCTCTCGCAATTACCATT…
>RcSWEET5d [gene=LOC112177411]
ATGACGAACACCGCTATGATCAGAACCGTTGTTGGCATTATCGGTAATATCATCTCGTTGGGTTTGTTTCTTTCTCCAATTCCAACTTTTGTGAAGATTGTCAAGCAAAAATCAGTTGCAGATTTCAAGCCAGATCCTTATCTAGCAACTCTGCTTAATTGTGCCGTCTGGGTTTTTTATGGAATGCCATTTGTTCATCCTGATAGCACCCTTGTCTGGACAATCAATGGTGCTGGTTTCATTATCGAATCCGCCTATACTGTCATCTTCATATTATACTCCCCTGGATCAAAACGTAGAAGGATCTTCATCGTTCTTGCGGTTGAAGCTGCCTTCTTTGCTGTTGTGGTTTTAGTCAACATGCTCGCTTTTCATACCACAAAAACCCGAACTCTGGTA…
