# Supplementary material for: Genome-Wide Identification of the Rose SWEET Gene Family and Their Different Expression Profiles in Cold Response between Two Rose Species
Source: Plants (Basel). 2023 Mar 28;12(7):1474. doi: 10.3390/plants12071474 (PMC10096651; doi:10.3390/plants12071474)
Supplement: Supplementary file 1 [file plants-12-01474-s001.zip › Supplementary file5-Table S4.xlsx]

## Sheet: Additional file4-Table S4
Additional file 4:Table S4 Estimated Ka/Ks ratios of the duplicated RcSWEET genes
Seq_1	Seq_2	Ka	Ks	Ka_Ks	EffectiveLen	AverageS-sites	AverageN-sites	cN	cS	pN	pS	Note
RcSWEET4a	RcSWEET5a	0.498424	3.27041	0.152404	699	174	525	191.167	128.833	0.364127	0.740421
Seq_1	Seq_2	Ka	Ks	Ka_Ks	EffectiveLen	AverageS-sites	AverageN-sites	cN	cS	pN	pS	Note
RcSWEET12	RcSWEET15a	0.334076	NaN	NaN	867	207.667	659.333	177.75	166.25	0.26959	0.800562	High Sequence Divergence Value (pS>=0.75)
