# Supplementary material for: Genome-Wide Identification of the Rose SWEET Gene Family and Their Different Expression Profiles in Cold Response between Two Rose Species
Source: Plants (Basel). 2023 Mar 28;12(7):1474. doi: 10.3390/plants12071474 (PMC10096651; doi:10.3390/plants12071474)
Supplement: Supplementary file 1 [file plants-12-01474-s001.zip › Supplementary file7-Table S6.xlsx]

## Sheet: 汇总
Additional file 6: Table S6 Transcriptome sequencing (RNA-seq) data of RcSWEET genes in different tissues (PRJNA546486)
GeneID	GeneName	Root_FPKM	Stem_FPKM	Prickle_FPKM	Leaf_FPKM	Stamen_FPKM	Pistil and Ovary_FPKM
RchiOBHmChr1g0344401	RcSWEET17a	1.65769	5.55953	5.19806	6.15428	0.293754	5.04541
RchiOBHmChr1g0349441	RcSWEET5f	0	0	0	0	0.286925	0
RchiOBHmChr1g0359391	RcSWEET5g	0	0	0	0	0.0397855	0
RchiOBHmChr1g0360181	RcSWEET5h	0.03817	0.230933	0.113693	0.108637	0.039611	0.377146
RchiOBHmChr1g0380151	RcSWEET3	0.042255	16.1504	0	38.871	0.261983	2.15961
RchiOBHmChr2g0146951	RcSWEET5c	0	0	0	0	0.0676305	0
RchiOBHmChr2g0171121	RcSWEET4a	0	0	0	0	0.378705	0.124627
RchiOBHmChr4g0401811	RcSWEET15b	0	0	0	0	0.035236	0.053632
RchiOBHmChr4g0413611	RcSWEET5e	0	0	0.0890105	0	0	0.0340925
RchiOBHmChr4g0423041	RcSWEET17b	1.6453	6.55733	3.78722	0.46489	0	0.308464
RchiOBHmChr4g0429511	RcSWEET15a	21.58	0.117016	0	0.25199	0	0
RchiOBHmChr5g0012811	RcSWEET2a	2.03205	5.98683	10.855	44.2481	1.19739	13.1599
RchiOBHmChr5g0029361	RcSWEET2b	9.70554	3.78622	6.85154	7.38619	3.31362	4.97323
RchiOBHmChr5g0083341	RcSWEET5b	0	0	0	0	0	0
RchiOBHmChr6g0277441	RcSWEET1	0.724558	9.90996	26.1478	49.9945	202.152	31.4981
RchiOBHmChr6g0292721	RcSWEET9	0	0	0	0	0	0
RchiOBHmChr6g0292761	RcSWEET11b	0	0	0	0	0	0
RchiOBHmChr6g0292771	RcSWEET11a	1.19824	0	0	0	0.131647	0
RchiOBHmChr6g0292781	RcSWEET10c	0.485538	4.84915	1.96735	0	0.0241815	6.76057
RchiOBHmChr6g0292811	RcSWEET10b	0.547222	0	0	0	0.468531	14.2296
RchiOBHmChr7g0186191	RcSWEET4b	35.2421	64.809	52.4121	0.733163	30.0927	78.0278
RchiOBHmChr7g0189331	RcSWEET12	35.5969	0	0	0	0	0
RchiOBHmChr7g0189341	RcSWEET10a	0	0	0	0	95.5273	6.0708
RchiOBHmChr7g0193781	RcSWEET5a	0	0	0	0	0.157346	0
RchiOBHmChr7g0193801	RcSWEET5d	0	0	0	0	434.189	0.526599
