# Supplementary material for: Genome-Wide Identification of the Rose SWEET Gene Family and Their Different Expression Profiles in Cold Response between Two Rose Species
Source: Plants (Basel). 2023 Mar 28;12(7):1474. doi: 10.3390/plants12071474 (PMC10096651; doi:10.3390/plants12071474)
Supplement: Supplementary file 1 [file plants-12-01474-s001.zip › Supplementary file8-Table S7.xlsx]

## Sheet: Sheet1
Additional file 7: Table S7 Transcriptome sequencing (RNA-seq) data of RbSWEET genes in leaves and shoots during cold acclimation
Gene Name	Gene ID	L0-1_FPKM	L0-1_count	L0-2_FPKM	L0-2_count	L0-3_FPKM	L0-3_count	L1-1_FPKM	L1-1_count	L1-2_FPKM	L1-2_count	L1-3_FPKM	L1-3_count	L6-1_FPKM	L6-1_count	L6-2_FPKM	L6-2_count	L6-3_FPKM	L6-3_count	L24-1_FPKM	L24-1_count	L24-2_FPKM	L24-2_count	L24-3_FPKM	L24-3_count	S0-1_FPKM	S0-1_count	S0-2_FPKM	S0-2_count	S0-3_FPKM	S0-3_count	S1-1_FPKM	S1-1_count	S1-2_FPKM	S1-2_count	S1-3_FPKM	S1-3_count	S6-1_FPKM	S6-1_count	S6-2_FPKM	S6-2_count	S6-3_FPKM	S6-3_count	S24-1_FPKM	S24-1_count	S24-2_FPKM	S24-2_count	S24-3_FPKM	S24-3_count
RcSWEET1	gene39614	168.57	6649	171.708	5663	173.287	6288	72.2898	2591	78.5849	3643	77.0009	3198	126.432	5195	131.567	5398	134.363	4475	244.64	12830	244.868	9625	246.378	8515	22.1204	1013	21.0021	1083	19.7324	921	15.1619	726	13.2822	641	14.9667	603	18.3128	687	15.6469	626	14.3276	730	44.7407	1615	45.2304	2060	43.7582	1626
RcSWEET2a	gene29087	57.1844	2338	53.627	1833	58.1927	2188	81.5789	3029	80.4282	3863	79.2912	3412	95.0723	4048	103.418	4397	108.479	3744	57.8704	3145	56.2032	2290	60.9603	2183	18.0934	858	17.9074	957	16.5909	802	11.7227	582	13.0631	653	11.8851	496	12.2668	477	12.9779	538	12.4495	657	7.90025	296	8.43254	398	10.2491	395
RcSWEET2b	gene30747	8.43226	453	7.57493	340	7.70427	381	8.75953	427	8.67928	548	8.44348	477	5.46266	306	5.47262	306	7.36921	334	3.01719	216	2.8206	151	3.81024	180	1.94919	122	1.2619	89	1.95393	124	1.62045	106	1.87298	123	1.33317	74	0.687736	36	0.575232	32	1.055	74	0.516592	26	0.347457	22	0.601795	31
RcSWEET3	gene6736	20.8067	551	22.5358	499	23.3141	568	34.5843	832	28.457	886	33.2633	927	20.4346	564	20.7686	572	22.2228	497	13.9321	491	13.4234	355	14.3804	334	10.7995	332	9.78529	339	11.2898	354	8.87315	286	8.22278	266	7.94874	215	10.4818	264	11.7393	316	12.199	417	6.86635	167	7.05938	216	7.51587	188
RcSWEET4a	gene15909	0	0	0	0	0	0	0	0	0	0	0	0	0	0	0	0	0	0	0	0	0	0	0	0	0	0	0	0	0	0	0	0	0	0	0	0	0	0	0	0	0	0	0	0	0	0	0	0
RcSWEET4b	gene44130	9.91944	487	8.22862	338	9.01407	407	2.59158	116	2.22401	129	2.64171	137	1.96108	101	1.72447	89	2.11579	88	5.06968	331	5.10719	250	4.85314	209	159.638	9085	162.314	10404	165.623	9609	87.8351	5231	83.5589	5010	91.7131	4594	120.077	5596	121.26	6031	111.714	7073	120.131	5392	128.594	7284	119.186	5506
RcSWEET5a	gene44890	0	0	0	0	0	0	0	0	0	0	0	0	0	0	0	0	0	0	0	0	0	0	0	0	0	0	0	0	0	0	0	0	0	0	0	0	0	0	0	0	0	0	0	0	0	0	0	0
RcSWEET5b	gene36176	0	0	0	0	0	0	0	0	0	0	0	0	0	0	0	0	0	0	0	0	0	0	0	0	0	0	0	0	0.051817	2	0	0	0	0	0	0	0	0	0	0	0	0	0	0	0	0	0	0
RcSWEET5c	gene13488	0	0	0	0	0	0	0	0	0	0	0	0	0	0	0	0	0	0	0	0	0	0	0	0	0	0	0	0	0	0	0	0	0	0	0	0	0	0	0	0	0	0	0	0	0	0	0	0
RcSWEET5d	gene44892	0	0	0	0	0	0	0	0	0	0	0	0	0.149147	5	0	0	0	0	0.018299	1	0	0	0.075564	2	0	0	0	0	0	0	0	0	0	0	0	0	0	0	0	0	0	0	0	0	0	0	0	0
RcSWEET5e	gene24424	0	0	0	0	0	0	0	0	0	0	0	0	0	0	0	0	0	0	0	0	0	0	0	0	0	0	0	0	0	0	0	0	0	0	0	0	0	0	0	0	0	0	0	0	0	0	0	0
RcSWEET5f	gene3657	0	0	0	0	0	0	0	0	0	0	0	0	0	0	0	0	0	0	0	0	0	0	0	0	0.542	15	0.739595	23	0.760938	22	0.400421	12	0.637111	19	0.36625	9	0.180766	5	0.284792	7	0.420511	13	0.346543	8	0.46911	13	0.132028	3
RcSWEET5g	gene4653	0	0	0	0	0	0	0	0	0	0	0	0	0	0	0	0	0	0	0	0	0	0	0	0	0	0	0	0	0	0	0	0	0	0	0	0	0	0	0	0	0	0	0	0	0	0	0	0
RcSWEET5h	gene4732	0	0	0.068083	3	0.114137	5	0	0	0.040501	3	0.057228	3	0.026263	2	0.076403	4	0	0	0.091691	6	0	0	0.114952	5	0.054117	3	0.075771	5	0.062247	4	0.077771	4	0.08075	5	0	0	0.11997	5	0.084852	4	0	0	0.041484	2	0.063826	4	0.044321	2
RcSWEET9	gene41153	0	0	0	0	0	0	0	0	0	0	0	0	0	0	0	0	0	0	0	0	0	0	0	0	0	0	0	0	0	0	0	0	0	0	0	0	0	0	0	0	0	0	0	0	0	0	0	0
RcSWEET10a	gene44446	0	0	0	0	0	0	0	0	0	0	0	0	0	0	0	0	0	0	0	0	0	0	0	0	0	0	0	0	0	0	0	0	0	0	0	0	0.033506	2	0	0	0	0	0	0	0	0	0	0
RcSWEET10b	gene41162	0	0	0	0	0	0	0	0	0	0	0	0	0	0	0	0	0.083244	3	0	0	0	0	0	0	0	0	0	0	0	0	0	0	0	0	0	0	0	0	0	0	0.036323	2	0	0	0	0	0	0
RcSWEET10c	gene41159	0.734695	38	0.275327	12	0.221199	11	0.649624	30	0.285061	17	0.431035	23	5.82855	307	5.32328	280	5.92763	253	25.0916	1686	25.9527	1307	26.1987	1160	16.4593	965	17.1684	1134	21.2195	1268	166.758	10227	176.229	10879	164.014	8460	384.082	18430	438.639	22465	406.677	26514	355.153	16414	381.532	22253	394.03	18745
RcSWEET11a	gene41158	0.120415	4	0	0	0	0	0	0	0	0	0	0	0	0	0	0	0	0	0	0	0.147696	5	0	0	1.08286	37	1.17003	45	2.12487	73	1.4482	51	0.971949	35	1.38788	41	1.55853	43	2.15521	64	1.63214	61	1.38145	37	1.32444	45	1.08509	30
RcSWEET11b	gene41157	0	0	0	0	0	0	0	0	0	0	0	0	0	0	0	0	0	0	0	0	0	0	0	0	0	0	0	0	0	0	0	0	0	0	0	0	0	0	0	0	0	0	0	0	0	0	0	0
RcSWEET12	gene44445	0	0	0	0	0.04192	2	0	0	0	0	0	0	0	0	0	0	0	0	0	0	0	0	0	0	0	0	0	0	0	0	0	0	0	0	0	0	0	0	0	0	0	0	0	0	0	0	0	0
RcSWEET15a	gene26013	21.7983	1045	21.4136	858	22.6331	998	13.0721	569	12.8605	724	12.8561	649	27.8868	1392	27.2144	1357	29.6653	1200	38.0071	2421	36.6051	1748	41.6636	1749	58.4885	3250	57.3502	3589	57.3261	3247	19.554	1137	19.5617	1145	22.0108	1077	17.7103	806	21.0063	1021	17.8236	1102	14.2902	627	14.9313	826	14.255	643
RcSWEET15b	gene23241	0	0	0	0	0	0	0	0	0	0	0	0	0	0	0	0	0	0	0	0	0	0	0	0	0	0	0	0	0	0	0	0	0	0	0	0	0	0	0	0	0	0	0	0	0	0	0	0
RcSWEET17a	gene3149	34.272	1804	36.661	1613	39.2257	1899	32.8385	1570	29.8913	1849	29.8901	1656	34.7368	1904	34.2659	1876	37.7301	1677	32.3881	2266	33.5985	1762	34.0793	1572	7.98518	488	7.40056	509	7.77373	484	5.81515	372	6.47938	417	6.52678	351	4.88913	245	5.38877	288	5.69982	387	3.69431	178	3.50808	214	4.38784	218
RcSWEET17b	gene25366	1.3155	33	0.888071	19	2.22079	51	1.28563	29	0.899324	26	1.02757	27	0.734245	19	0.557952	15	0.582156	13	0.522744	18	0.606526	15	1.5946	35	0.074791	3	0.173923	6	0.142966	5	0.106503	4	0.342604	11	0.248205	7	0.373156	9	0.443916	12	0.402812	13	1.56933	36	0.97084	28	1.5402	36
