# Supplementary figures and images for: Genome-Wide Identification of the Rose SWEET Gene Family and Their Different Expression Profiles in Cold Response between Two Rose Species
Source: MDPI journal article supplement (doi:10.3390/plants12071474), 2023-03-28

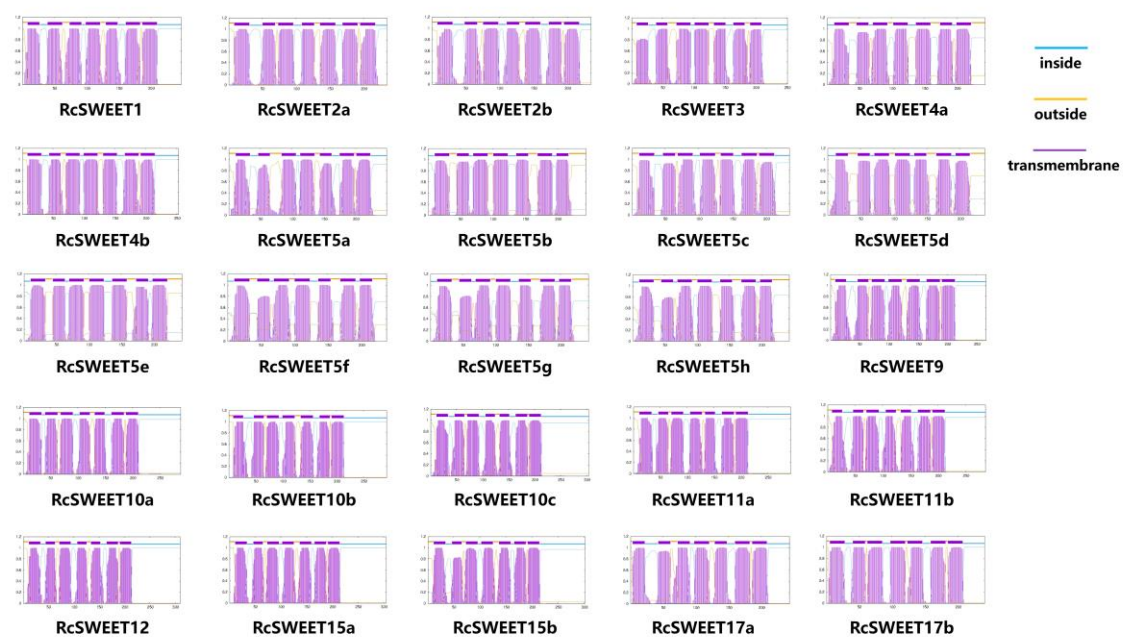

**Figure S1.** The transmembrane structure of 25 RcSWEET proteins.

Supplement: s1 [file s1]
